# Supplementary material
Source: PubMed Central journal article supplement (PMC3169159)
Supplement: 1110927108_pnas.1110927108_SI.pdf [file 1110927108_pnas.1110927108_SI.pdf]

# Supporting Information

Liu et al. 10.1073/pnas.1110927108

## SI Methods

**Kinetic Data Analysis.** The scheme of cyclobutane pyrimidine dimer (CPD) repair by photolyase is shown in Fig. 1. Assuming that the enzyme-substrate complex concentration involved in reaction is  $n_0$  upon excitation at time-zero, the dynamics of each step involved in the entire reaction will be solved by fitting the following equations according to the reaction scheme:

$$[\text{FADH}^{-*}]_{t=0} = n_0 \quad \text{[S1]}$$

$$\frac{d[\text{FADH}^{-*}(t)]}{dt} = -(k_{\text{FET}} + k_{\text{LT}})[\text{FADH}^{-*}(t)] \quad \text{[S2]}$$

$$\frac{d[T\langle\rangle T^{-}(t)]}{dt} = k_{\text{FET}}[\text{FADH}^{-*}(t)] - k_{\text{sp1}}[T\langle\rangle T^{-}(t)] - k_{\text{BET}}[T\langle\rangle T^{-}(t)] \quad \text{[S3]}$$

$$\frac{d[T-T^{-}(t)]}{dt} = k_{\text{sp1}}[T\langle\rangle T^{-}(t)] - k_{\text{sp2}}[T-T^{-}(t)] - k_{\text{BET}}[T-T^{-}(t)] \quad \text{[S4]}$$

$$\frac{d[T^{-}(t)]}{dt} = k_{\text{sp2}}[T-T^{-}(t)] - k_{\text{ER}}[T^{-}(t)] \quad \text{[S5]}$$

$$\frac{d[T(t)]}{dt} = k_{\text{sp2}}[T-T^{-}(t)] + k_{\text{ER}}[T^{-}(t)] \quad \text{[S6]}$$

$$[\text{FADH}^{*}(t)] = [T\langle\rangle T^{-}(t)] + [T-T^{-}(t)] + [T^{-}(t)] \quad \text{[S7]}$$

$$[\text{FADH}^{-}(t)] = n_0 - [\text{FADH}^{-*}(t)] - [\text{FADH}^{*}(t)] \quad \text{[S8]}$$

Before pump excitation, the  $[\text{FADH}^{-}]$  is  $n_0$  and the concentrations of  $\text{FADH}^{-*}$ ,  $\text{FADH}^{*}$ ,  $T\langle\rangle T^{-}$ ,  $T-T^{-}$ ,  $T^{-}$ , and  $T$  are zero. According to the Beer-Lambert law, the signal of femtosecond transient absorption at any wavelength can be acquired as:

$$\begin{aligned} \Delta A(t) \propto & \varepsilon_{\text{FADH}^{-*}}([\text{FADH}^{-*}(t)] - [\text{FADH}^{-*}]_{t<0}) \\ & + \varepsilon_{\text{FADH}^{*}}([\text{FADH}^{*}(t)] - [\text{FADH}^{*}]_{t<0}) \\ & + \varepsilon_{\text{FADH}^{-}}([\text{FADH}^{-}(t)] - [\text{FADH}^{-}]_{t<0}) \\ & + \varepsilon_{T\langle\rangle T^{-}}([T\langle\rangle T^{-}(t)] - [T\langle\rangle T^{-}]_{t<0}) \\ & + \varepsilon_{T-T^{-}}([T-T^{-}(t)] - [T-T^{-}]_{t<0}) + \varepsilon_{T^{-}}([T^{-}(t)] - [T^{-}]_{t<0}) \\ & + \varepsilon_T([T(t)] - [T]_{t<0}) \propto \varepsilon_{\text{FADH}^{-*}}[\text{FADH}^{-*}(t)] \\ & + \varepsilon_{\text{FADH}^{*}}[\text{FADH}^{*}(t)] + \varepsilon_{\text{FADH}^{-}}([\text{FADH}^{-}(t)] - n_0) \\ & + \varepsilon_{T\langle\rangle T^{-}}[T\langle\rangle T^{-}(t)] + \varepsilon_{T-T^{-}}[T-T^{-}(t)] \\ & + \varepsilon_{T^{-}}[T^{-}(t)] + \varepsilon_T[T(t)]. \end{aligned} \quad \text{[S9]}$$

We observed  $\text{FADH}^{-*}$  at all wavelengths, while  $\text{FADH}^{*}$  signal was probed from wavelengths of shorter than 620 nm. The  $\text{FADH}^{-}$  signal is captured from 500 to 260 nm. All thymine-related intermediates, which have absorption in UV region, were detected below 360 nm. The thymine product was detected clearly below 300 nm in absorption transients. There is no  $T\langle\rangle T^{-}$  absorption, which is mainly shorter than 250 nm, at all wavelengths we probed, and thus no signal contains the  $T\langle\rangle T^{-}$  contribution.

In addition, the decay of  $\text{FADH}^{-*}$  is controlled by both lifetime emission ( $k_{\text{LT}}$ ) and forward ET, thus we observed a total rate of excited-state decay as  $k = k_{\text{LT}} + k_{\text{FET}}$  at all wavelengths. The forward ET rate was then deconvoluted from the fitting results. Also, according to Eq. S7, the concentration of  $\text{FADH}^{*}$  is equal to the sum of three thymine-related intermediates. Because the  $T\langle\rangle T^{-}$  has trace amount accumulation due to the ultrafast  $k_{\text{sp1}}$ , the sum of signal of  $T-T^{-}$  and  $T^{-}$  will be almost identical to that of  $\text{FADH}^{*}$ . Due to the fact that we do not have any absorption spectra of  $T-T^{-}$  and  $T^{-}$  in protein environment, it is not easy to differentiate the total signal of  $T-T^{-}$  and  $T^{-}$  intermediates from that of  $\text{FADH}^{*}$ . Instead, only the species with the stronger absorption,  $T-T^{-}$  or  $T^{-}$ , can be usually obtained as shown in the inset of Fig. 2A, which is also the reason that only one intermediate, either  $T-T^{-}$  or  $T^{-}$ , shows the absorption spectrum in the UV region from 260 to 360 nm. Thus, the results of  $T-T^{-}$  and  $T^{-}$  are not the true absorption spectra and only represent the relative absorption between two intermediates. The magnitudes of  $T-T^{-}$  and  $T^{-}$  were calibrated by comparison with the known flavin ground-state absorption.
